# Supplementary material for: DPT tautomerisation of the G·Asynand A*·G*synDNA mismatches: a QM/QTAIM combined atomistic investigation
Source: Royal Society of Chemistry journal article supplement (doi:10.1039/c4cp00488d), 2014-01-01
Supplement: c4cp00488d1.pdf [file c4cp00488d1.pdf]

## Supplementary Material

### **DPT tautomerisation of the $G \cdot A_{\text{syn}}$ and $A^* \cdot G^*_{\text{syn}}$ DNA mismatches: A QM/QTAIM combined atomistic investigation**

Ol'ha O. Brovarets' and Dmytro M. Hovorun<sup>✉</sup>

<sup>a</sup>Department of Molecular and Quantum Biophysics, Institute of Molecular Biology and Genetics, National Academy of Sciences of Ukraine, 150 Akademika Zabolotnoho Str., 03680 Kyiv, Ukraine

<sup>b</sup>Department of Molecular Biotechnology and Bioinformatics, Institute of High Technologies, Taras Shevchenko National University of Kyiv, 2-h Akademika Hlushkova Ave., 03022 Kyiv, Ukraine

<sup>✉</sup>Corresponding author. Email: dhovorun@imbg.org.ua.

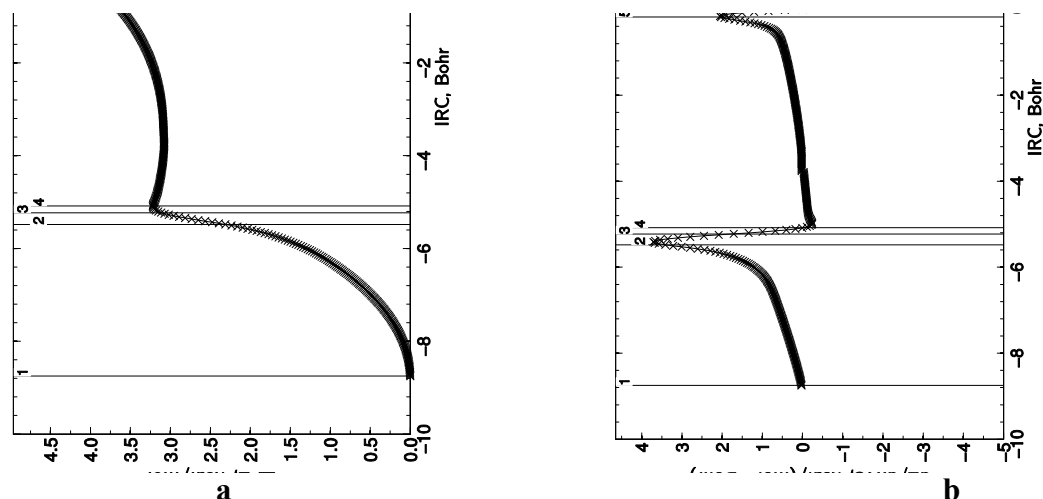

**Fig. S1** Profiles of: (a) the electronic energy  $E$  of the base mispair and (b) the first derivative of the electronic energy  $E$  with respect to the IRC -  $dE/dIRC$  - along the IRC of the  $A^* \cdot G^*_{syn} \leftrightarrow A \cdot G^*_{syn}$  tautomerisation *via* the DPT obtained at the B3LYP/6-311++G(d,p) level of theory *in vacuo*. The position of the  $TS_{A^* \cdot G^*_{syn} \leftrightarrow A \cdot G^*_{syn}}$  corresponds to IRC=0.00 Bohr.

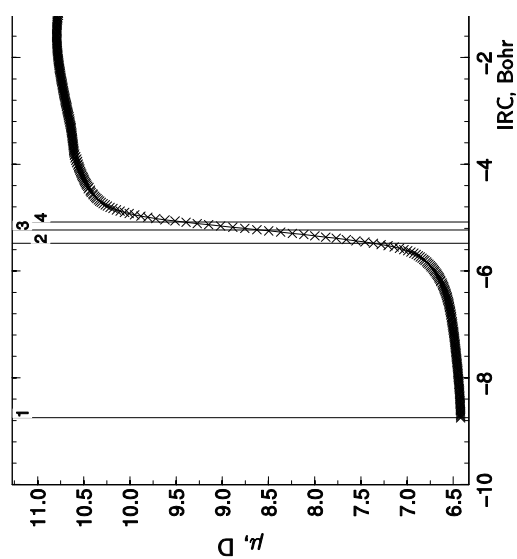

**Fig. S2** Profile of the dipole moment  $\mu$  of the base mispair along the IRC of the  $A^* \cdot G^*_{syn} \leftrightarrow A \cdot G^*_{syn}$  tautomerisation *via* the DPT obtained at the B3LYP/6-311++G(d,p) level of theory *in vacuo*.

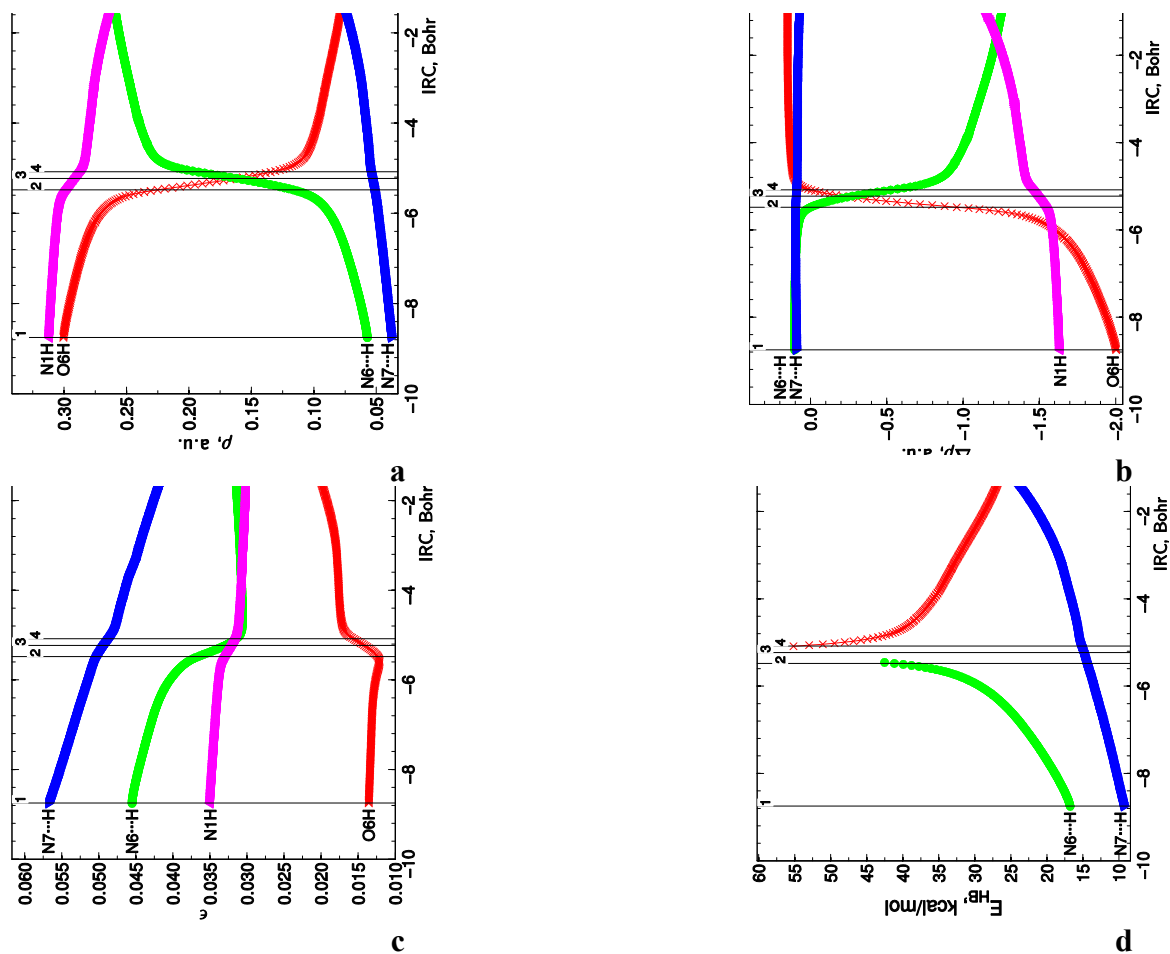

**Fig. S3** Profiles of: **(a)** the electron density  $\rho$ ; **(b)** the Laplacian of the electron density  $\Delta\rho$ ; **(c)** the ellipticity  $\epsilon$  and **(d)** the energy of the H-bond  $E_{HB}$ , estimated by the EML formula [1,2], at the (3,-1) BCPs of the covalent and hydrogen bonds along the IRC of the  $A^* \cdot G^*_{syn} \leftrightarrow A \cdot G^*_{syn}$  tautomerisation *via* the DPT obtained at the B3LYP/6-311++G(d,p) level of theory *in vacuo*.

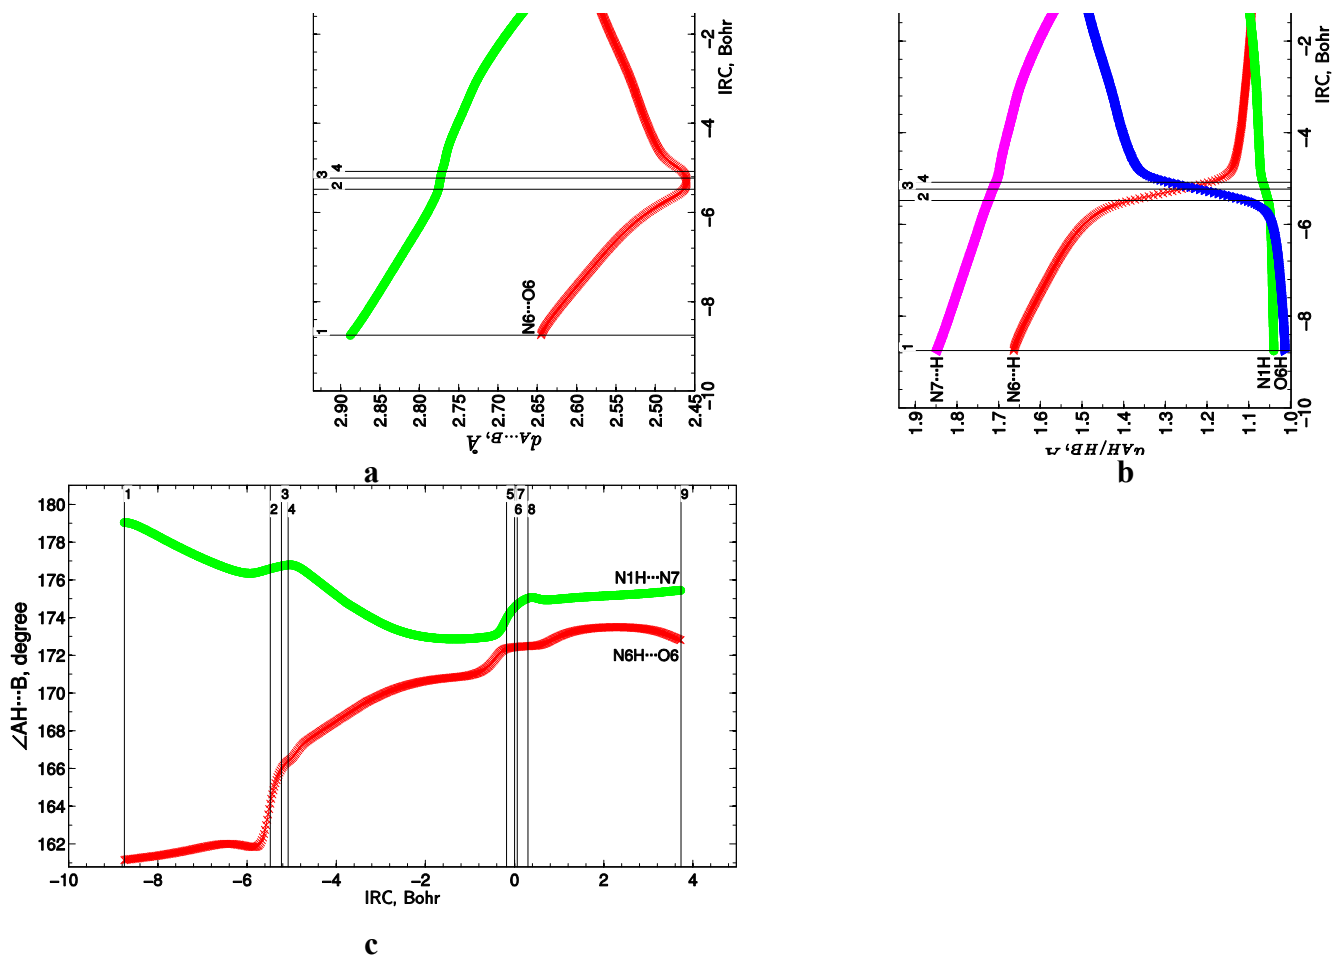

**Fig. S4** Profiles of: **(a)** the distance  $d_{A...B}$  between the electronegative A and B atoms; **(b)** the distance  $d_{AH/HB}$  between the hydrogen and electronegative A or B atoms and **(c)** the angle  $\angle AH...B$  of the  $AH...B$  H-bonds along the IRC of the  $A^* \cdot G^*_{syn} \leftrightarrow A \cdot G^*_{syn}$  tautomerisation *via* the DPT obtained at the B3LYP/6-311++G(d,p) level of theory *in vacuo*.

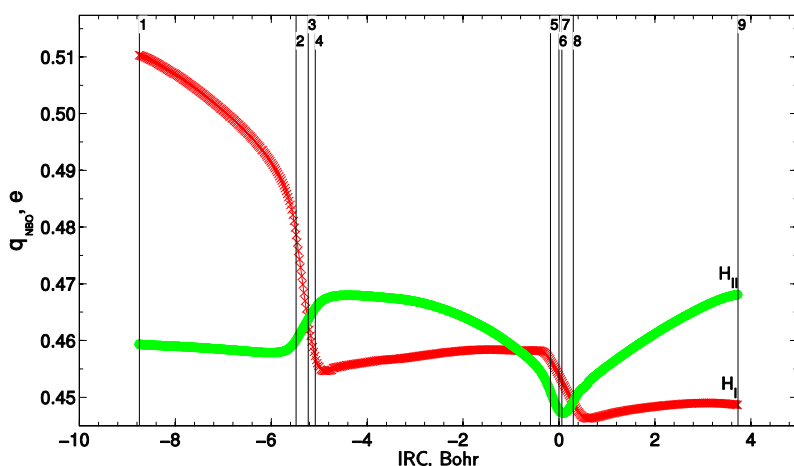

**Fig. S5** Profiles of the NBO charges of the hydrogen atoms involved in the  $O6H_I \cdots N6/N6H_I \cdots O6$  and  $N1H_{II} \cdots N7/N7H_{II} \cdots N1$  H-bonds along the IRC of the  $A^* \cdot G^*_{syn} \leftrightarrow A \cdot G^*_{syn}$  tautomerisation *via* the DPT obtained at the B3LYP/6-311++G(d,p) level of theory *in vacuo*.

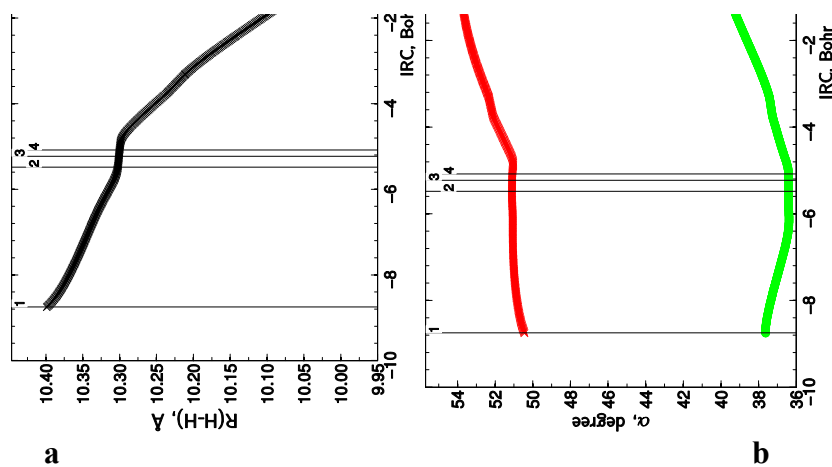

**Fig. S6** Profiles of: (a) the distance  $R(H-H)$  between the glycosidic hydrogens and (b) the  $\alpha_1$  ( $\angle N9H(A)H(G_{syn})$ ) and  $\alpha_2$  ( $\angle N9H(G_{syn})H(A)$ ) glycosidic angles along the IRC of the  $A^* \cdot G^*_{syn} \leftrightarrow A \cdot G^*_{syn}$  tautomerisation *via* the DPT obtained at the B3LYP/6-311++G(d,p) level of theory *in vacuo*.

## References.

1. Espinosa E., Molins E., Lecomte C. Hydrogen bond strengths revealed by topological analyses of experimentally observed electron densities, *Chem. Phys. Lett.*, 1998, **285**, 170–173.
2. Mata I., Alkorta I., Espinosa E., Molins E. Relationships between interaction energy, intermolecular distance and electron density properties in hydrogen bonded complexes under external electric fields, *Chem. Phys. Lett.*, 2011, **507**, 185–189.
